# Supplementary material
Source: publisher site journal article supplement (https://e-cmh.org/upload/media/cmh-2023-0384-Supplementary-Fig-1.pdf)

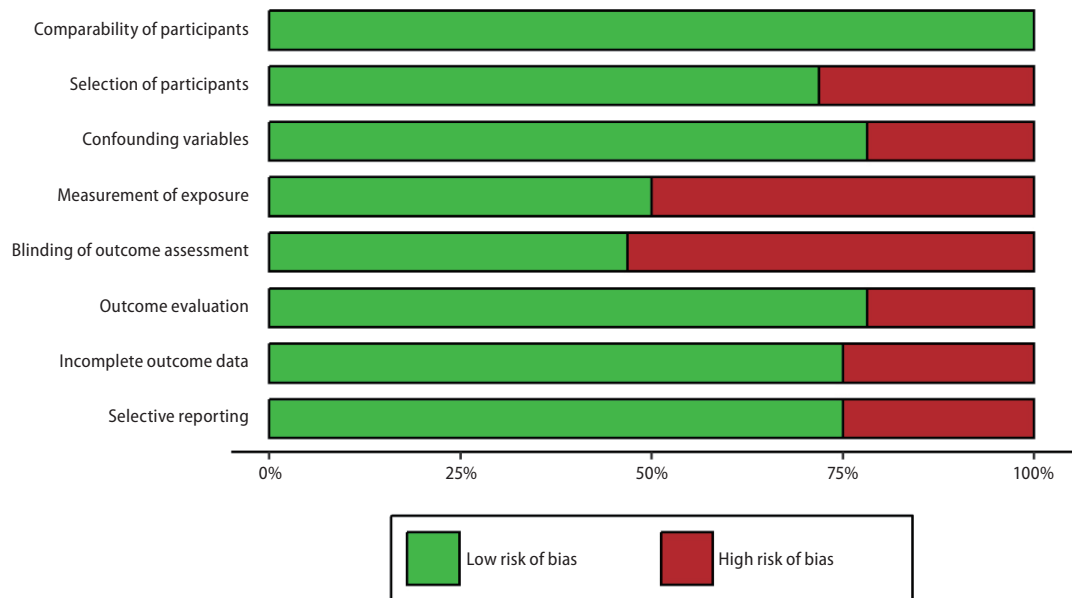

**Supplementary Figure 1.** Risk of bias summary.

Supplement: Supplementary file 1 [file cmh-2023-0384-Supplementary-Fig-1.pdf]
